# Supplementary material
Source: Research Square preprint supplement (doi:10.21203/rs.3.rs-9368528/v1)
Supplement: Supplementary file 1 [file 11c6ed51e07b45e1bdbd82e7.docx]

**Supplementary Material for: “Farmland bird diversity requires heterogeneity between and within habitats”**

**Authors:** Marit Kinga Kasten, Thomas Hiller, Sara Tassoni, Rosalie Böhmer, Frank M. Schurr, Markus Röhl, Michael Roth, Ingo Grass

*
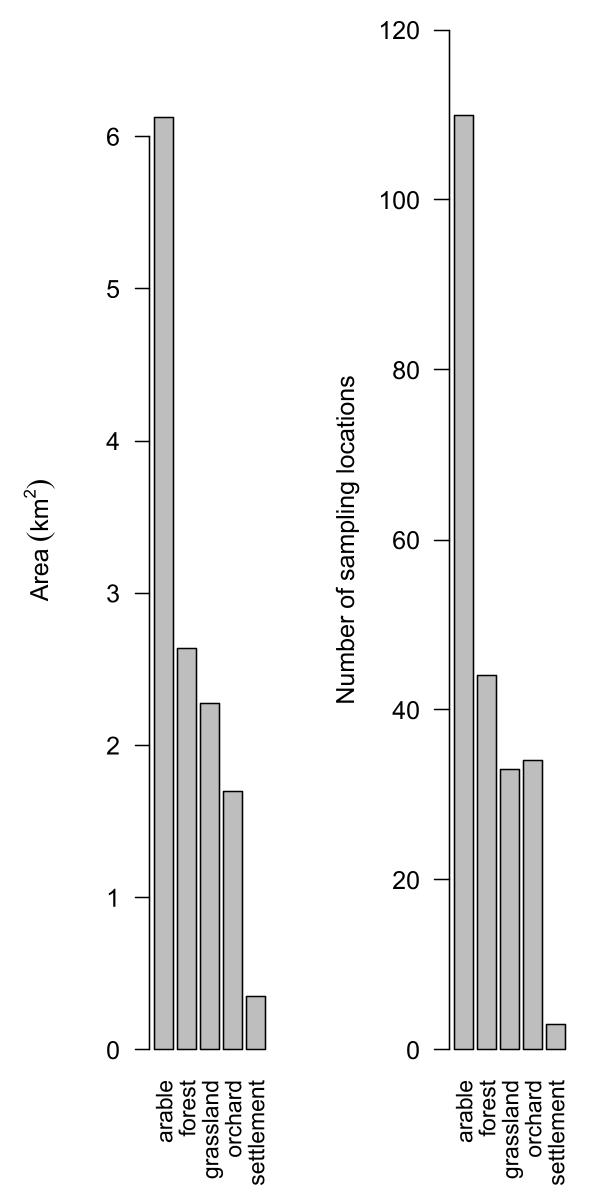
*

*Figure S1: (a) Total area and (b) number of sampling locations for each habitat type, both summed across all 14 landscapes. The portion of a habitat type’s total area present over all landscapes corresponded with their portion of sampling locations. For instance, arable land was present on 6.13 km2 among all 14 landscapes and was assigned 110 times as habitat type (figure similar to Scherber et al. 2019).*

*Table S1: All validated bird species (Scientific, English and German name) and their calculated cut-off values to filter BirdNET’s identifications based on the confidence scores to only retain BirdNET identifications with a probability > 95%. For example, a confidence score cut-off value of 1.01 will lead to a complete elimination of this species from the dataset.*

| **Scientific name** | **English name** | **German name** | **confidence score cut-off value** |
| --- | --- | --- | --- |
| Acanthis cabaret | Lesser Redpoll | Alpenbirkenzeisig | 1.010 |
| Acrocephalus arundinaceus | Great Reed Warbler | Drosselrohrsänger | 1.010 |
| Acrocephalus palustris | Marsh Warbler | Sumprohrsänger | 0.406 |
| Acrocephalus schoenobaenus | Sedge Warbler | Schilfrohrsänger | 0.748 |
| Acrocephalus scirpaceus | Eurasian Reed Warbler | Teichrohrsänger | 0.468 |
| Aegithalos caudatus | Long-tailed Tit | Schwanzmeise | 0.901 |
| Alauda arvensis | Eurasian Skylark | Feldlerche | 0.000 |
| Anthus spinoletta | Water Pipit | Bergpieper | 0.758 |
| Anthus trivialis | Tree Pipit | Baumpieper | 1.010 |
| Apus apus | Common Swift | Mauersegler | 0.997 |
| Carduelis carduelis | European Goldfinch | Stieglitz | 0.793 |
| Certhia brachydactyla | Short-toed Treecreeper | Gartenbaumläufer | 0.967 |
| Certhia familiaris | Eurasian Treecreeper | Waldbaumläufer | 0.718 |
| Chloris chloris | European Greenfinch | Grünfink | 0.169 |
| Chroicocephalus ridibundus | Black-headed Gull | Lachmöwe | 1.000 |
| Ciconia ciconia | White Stork | Weißstorch | 1.010 |
| Coccothraustes coccothraustes | Hawfinch | Kernbeißer | 0.872 |
| Columba oenas | Stock Dove | Hohltaube | 1.010 |
| Columba palumbus | Common Wood-Pigeon | Ringeltaube | 0.591 |
| Corvus corax | Common Raven | Kolkrabe | 0.556 |
| Corvus cornix | Hooded Crow | Nebelkrähe | 0.000 |
| Corvus corone | Carrion Crow | Rabenkrähe | 0.121 |
| Corvus frugilegus | Rook | Saatkrähe | 0.147 |
| Corvus monedula | Eurasian Jackdaw | Dohle | 0.796 |
| Cuculus canorus | Common Cuckoo | Kuckuck | 0.594 |
| Curruca communis | Greater Whitethroat | Dorngrasmücke | 0.694 |
| Curruca curruca | Lesser Whitethroat | Klappergrasmücke | 1.010 |
| Cyanistes caeruleus | Eurasian Blue Tit | Blaumeise | 0.195 |
| Delichon urbicum | Common House-Martin | Mehlschwalbe | 0.880 |
| Dendrocopos major | Great Spotted Woodpecker | Buntspecht | 0.949 |
| Dendrocoptes medius | Middle Spotted Woodpecker | Mittelspecht | 0.630 |
| Dryobates minor | Lesser Spotted Woodpecker | Kleinspecht | 1.010 |
| Dryocopus martius | Black Woodpecker | Schwarzspecht | 0.719 |
| Emberiza calandra | Corn Bunting | Grauammer | 1.010 |
| Emberiza citrinella | Yellowhammer | Goldammer | 0.451 |
| Emberiza schoeniclus | Reed Bunting | Rohrammer | 1.010 |
| Erithacus rubecula | European Robin | Rotkehlchen | 0.375 |
| Falco peregrinus | Peregrine Falcon | Wanderfalke | 0.695 |
| Falco subbuteo | Eurasian Hobby | Baumfalke | 1.010 |
| Falco tinnunculus | Eurasian Kestrel | Turmfalke | 0.821 |
| Ficedula hypoleuca | European Pied Flycatcher | Trauerschnäpper | 1.010 |
| Fringilla coelebs | Common Chaffinch | Buchfink | 0.260 |
| Fringilla montifringilla | Brambling | Bergfink | 1.010 |
| Garrulus glandarius | Eurasian Jay | Eichelhäher | 0.429 |
| Hippolais icterina | Icterine Warbler | Gelbspötter | 1.010 |
| Hippolais polyglotta | Melodious Warbler | Orpheusspötter | 1.010 |
| Hirundo rustica | Barn Swallow | Rauchschwalbe | 0.684 |
| Ichthyaetus melanocephalus | Mediterranean Gull | Schwarzkopfmöwe | 1.010 |
| Jynx torquilla | Eurasian Wryneck | Wendehals | 1.010 |
| Lanius collurio | Red-backed Shrike | Neuntöter | 0.347 |
| Larus canus | Common Gull | Sturmmöwe | 1.010 |
| Larus michahellis | Yellow-legged Gull | Mittelmeermöwe | 1.010 |
| Linaria cannabina | Eurasian Linnet | Bluthänfling | 0.972 |
| Locustella luscinioides | Savi's Warbler | Rohrschwirl | 1.010 |
| Locustella naevia | Common Grasshopper-Warbler | Feldschwirl | 0.434 |
| Lophophanes cristatus | Crested Tit | Haubenmeise | 0.797 |
| Loxia curvirostra | Red Crossbill | Fichtenkreuzschnabel | 0.314 |
| Lullula arborea | Wood Lark | Heidelerche | 1.010 |
| Luscinia megarhynchos | Common Nightingale | Nachtigall | 0.174 |
| Motacilla alba | White Wagtail | Bachstelze | 0.670 |
| Motacilla cinerea | Gray Wagtail | Gebirgsstelze | 0.899 |
| Motacilla flava | Western Yellow Wagtail | Schafstelze | 0.534 |
| Muscicapa striata | Spotted Flycatcher | Grauschnäpper | 0.819 |
| Nucifraga caryocatactes | Eurasian Nutcracker | Tannenhäher | 1.010 |
| Oenanthe oenanthe | Northern Wheatear | Steinschmätzer | 1.000 |
| Oriolus oriolus | Eurasian Golden Oriole | Pirol | 0.696 |
| Parus major | Great Tit | Kohlmeise | 0.175 |
| Passer domesticus | House Sparrow | Haussperling | 0.080 |
| Passer montanus | Eurasian Tree Sparrow | Feldsperling | 0.000 |
| Periparus ater | Coal Tit | Tannenmeise | 0.905 |
| Phasianus colchicus | Ring-necked Pheasant | Jagdfasan | 0.899 |
| Phoenicurus ochruros | Black Redstart | Hausrotschwanz | 0.290 |
| Phoenicurus phoenicurus | Common Redstart | Gartenrotschwanz | 0.889 |
| Phylloscopus collybita | Common Chiffchaff | Zilpzalp | 0.169 |
| Phylloscopus sibilatrix | Wood Warbler | Waldlaubsänger | 1.010 |
| Phylloscopus trochilus | Willow Warbler | Fitis | 0.940 |
| Pica pica | Eurasian Magpie | Elster | 0.138 |
| Picus viridis | Eurasian Green Woodpecker | Grünspecht | 0.781 |
| Poecile montanus | Willow Tit | Weidenmeise | 1.010 |
| Poecile palustris | Marsh Tit | Sumpfmeise | 0.969 |
| Prunella modularis | Dunnock | Heckenbraunelle | 0.999 |
| Pyrrhula pyrrhula | Eurasian Bullfinch | Gimpel | 0.869 |
| Regulus ignicapilla | Common Firecrest | Sommergoldhähnchen | 0.827 |
| Regulus regulus | Goldcrest | Wintergoldhähnchen | 0.476 |
| Riparia riparia | Bank Swallow | Uferschwalbe | 1.010 |
| Saxicola rubetra | Whinchat | Braunkehlchen | 1.010 |
| Saxicola rubicola | European Stonechat | Schwarzkehlchen | 0.919 |
| Serinus serinus | European Serin | Girlitz | 1.000 |
| Sitta europaea | Eurasian Nuthatch | Kleiber | 0.297 |
| Spinus spinus | Eurasian Siskin | Erlenzeisig | 0.980 |
| Streptopelia decaocto | Eurasian Collared-Dove | Türkentaube | 0.974 |
| Streptopelia turtur | European Turtle-Dove | Turteltaube | 1.010 |
| Sturnus vulgaris | European Starling | Star | 0.384 |
| Sylvia atricapilla | Eurasian Blackcap | Mönchsgrasmücke | 0.202 |
| Sylvia borin | Garden Warbler | Gartengrasmücke | 0.353 |
| Troglodytes troglodytes | Eurasian Wren | Zaunkönig | 0.118 |
| Turdus iliacus | Redwing | Rotdrossel | 1.010 |
| Turdus merula | Eurasian Blackbird | Amsel | 0.000 |
| Turdus philomelos | Song Thrush | Singdrossel | 0.544 |
| Turdus pilaris | Fieldfare | Wacholderdrossel | 0.114 |
| Turdus torquatus | Ring Ouzel | Ringdrossel | 1.010 |
| Turdus viscivorus | Mistle Thrush | Misteldrossel | 0.506 |
| Vanellus vanellus | Northern Lapwing | Kiebitz | 1.010 |

Table S2: Bird species and their occurrence in our study landscapes. The number of total locations indicates at how many locations a species was present (max. number: 224). Percentage of arable locations, forest locations, grassland locations and orchard locations indicates the proportion (%) of arable locations etc. where the species was present. For example, we had 110 arable-dominated locations in our dataset. Thus, a species that was present at 11 arable-dominated locations, would have a value of 10 (%) in the column “percentage arable locations”. Bold numbers highlight the habitat type where the species proportionally was present the most. “Landscapes present” indicate the number of landscapes where the species was found. “Habitat density” and “Trophic niche” information are based on AVONET. Long-term population trends stem from Annex B of the German National Bird Protection Report (2019), where species classified as decreasing or increasing had lost or gained more than 20% of their population over the preceding 36 years.

| **Bird species** | **Total locations** | **Arable locations (%)** | **Forest locations (%)** | **Grassland locations (%)** | **Orchard locations (%)** | **Landscapespresent** | **Habitat density** | **Trophic niche** | **Long-term population trend** |
| --- | --- | --- | --- | --- | --- | --- | --- | --- | --- |
| *Aegithalos caudatus* | 8 | 2.7 | 4.5 | 3 | **5.9** | 6 | semi-open | Invertivore | stable |
| *Alauda arvensis* | 158 | **93.6** | 11.4 | 66.7 | 82.4 | 14 | open | Omnivore | decreasing |
| *Anthus spinoletta* | 3 | **2.7** | 0 | 0 | 0 | 2 | open | Invertivore | stable |
| *Carduelis carduelis* | 97 | 50.9 | 4.5 | 45.5 | **70.6** | 13 | semi-open | Granivore | stable |
| *Certhia brachydactyla* | 37 | 7.3 | 18.2 | 12.1 | **50** | 10 | dense | Invertivore | stable |
| *Certhia familiaris* | 50 | 6.4 | **79.5** | 18.2 | 5.9 | 9 | dense | Invertivore | stable |
| *Chloris chloris* | 182 | 90.9 | 40.9 | 90.9 | **100** | 14 | semi-open | Granivore | stable |
| *Coccothraustes coccothraustes* | 80 | 16.4 | 56.8 | **57.6** | 52.9 | 13 | dense | Omnivore | stable |
| *Columba palumbus* | 50 | 5.5 | **63.6** | 27.3 | 20.6 | 10 | semi-open | Omnivore | increasing |
| *Corvus monedula* | 1 | **0.9** | 0 | 0 | 0 | 1 | open | Omnivore | stable |
| *Corvus* spp. | 220 | **100** | 97.7 | **100** | **100** | 14 | open | Omnivore | stable |
| *Curruca communis* | 13 | 7.3 | 2.3 | 3 | **8.8** | 6 | open | Invertivore | increasing |
| *Cyanistes caeruleus* | 200 | 81.8 | **100** | 97 | **100** | 14 | dense | Invertivore | stable |
| *Delichon urbicum* | 1 | 0 | 0 | **3.0** | 0 | 1 | open | Invertivore | decreasing |
| *Dendrocopos major* | 21 | 4.5 | 11.4 | 6.1 | **26.5** | 8 | dense | Omnivore | increasing |
| *Dendrocoptes medius* | 83 | 11.8 | **79.5** | 54.5 | 50 | 12 | dense | Invertivore | increasing |
| *Dryocopus martius* | 11 | 0 | **22.7** | 3 | 0 | 4 | dense | Invertivore | stable |
| *Emberiza citrinella* | 145 | 68.2 | 18.2 | 90.9 | **94.1** | 14 | open | Granivore | stable |
| *Erithacus rubecula* | 136 | 41.8 | **100** | 66.7 | 70.6 | 14 | dense | Omnivore | stable |
| *Falco tinnunculus* | 63 | 30 | 2.3 | 36.4 | **50** | 12 | open | Vertivore | stable |
| *Fringilla coelebs* | 163 | 62.7 | **95.5** | 72.7 | 82.4 | 14 | semi-open | Invertivore | stable |
| *Garrulus glandarius* | 28 | 2.7 | **40.9** | 18.2 | 2.9 | 9 | dense | Omnivore | stable |
| *Hirundo rustica* | 12 | 2.7 | 0 | **21.2** | 5.9 | 4 | open | Invertivore | decreasing |
| *Lanius collurio* | 14 | 1.8 | 0 | **18.2** | 17.6 | 8 | open | Invertivore | stable |
| *Linaria cannabina* | 2 | **1.8** | 0 | 0 | 0 | 1 | semi-open | Granivore | decreasing |
| *Lophophanes cristatus* | 7 | 0.9 | **9.1** | 6.1 | 0 | 5 | dense | Invertivore | stable |
| *Loxia curvirostra* | 3 | 0.9 | 0 | 0 | **5.9** | 3 | dense | Granivore | unknown |
| *Luscinia megarhynchos* | 82 | 20.9 | 36.4 | 48.5 | **79.4** | 13 | dense | Invertivore | increasing |
| *Motacilla alba* | 78 | **48.2** | 0 | 27.3 | 47.1 | 14 | open | Invertivore | decreasing |
| *Motacilla cinerea* | 1 | **0.9** | 0 | 0 | 0 | 1 | open | Invertivore | stable |
| *Motacilla flava* | 27 | **20.9** | 0 | 6.1 | 5.9 | 8 | open | Invertivore | stable |
| *Muscicapa striata* | 21 | 4.5 | **18.2** | 15.2 | 8.8 | 10 | dense | Invertivore | stable |
| *Oriolus oriolus* | 30 | 5.5 | **25** | 18.2 | 20.6 | 8 | dense | Omnivore | stable |
| *Parus major* | 211 | 91.8 | **100** | 97 | **100** | 14 | semi-open | Invertivore | stable |
| *Passer* spp. | 141 | 79.1 | 9.1 | 66.7 | **82.4** | 14 | open | Granivore | stable |
| *Periparus ater* | 8 | 0 | **13.6** | 3 | 2.9 | 5 | dense | Invertivore | stable |
| *Phoenicurus ochruros* | 120 | 61.8 | 18.2 | 63.6 | **67.6** | 14 | open | Invertivore | stable |
| *Phoenicurus phoenicurus* | 40 | 10.9 | 0 | 18.2 | **64.7** | 10 | dense | Invertivore | increasing |
| *Phylloscopus collybita* | 176 | 62.7 | **97.7** | 97 | 94.1 | 14 | dense | Invertivore | stable |
| *Pica pica* | 82 | 37.3 | 6.8 | 51.5 | **61.8** | 14 | open | Omnivore | stable |
| *Picus viridis* | 150 | 53.6 | **79.5** | 78.8 | 88.2 | 13 | semi-open | Invertivore | increasing |
| *Poecile palustris* | 22 | 2.7 | 20.5 | 9.1 | **20.6** | 7 | dense | Invertivore | stable |
| *Pyrrhula pyrrhula* | 1 | 0 | 0 | 3.0 | 0 | 1 | semi-open | Omnivore | increasing |
| *Regulus ignicapilla* | 30 | 1.8 | **54.5** | 9.1 | 2.9 | 7 | dense | Invertivore | stable |
| *Regulus regulus* | 37 | 4.5 | **52.3** | 12.1 | 14.7 | 10 | dense | Invertivore | decreasing |
| *Sitta europaea* | 106 | 22.7 | **97.7** | 54.5 | 58.8 | 12 | dense | Invertivore | increasing |
| *Sturnus vulgaris* | 100 | 40.9 | 6.8 | 60.6 | **94.1** | 14 | open | Omnivore | decreasing |
| *Sylvia atricapilla* | 169 | 67.3 | **97.7** | 78.8 | 76.5 | 14 | dense | Omnivore | increasing |
| *Sylvia borin* | 32 | 10 | 13.6 | **24.2** | 20.6 | 10 | dense | Omnivore | decreasing |
| *Troglodytes troglodytes* | 136 | 33.6 | **97.7** | 81.8 | 85.3 | 14 | dense | Invertivore | stable |
| *Turdus merula* | 219 | 98.2 | **100** | **100** | **100** | 14 | semi-open | Omnivore | stable |
| *Turdus philomelos* | 87 | 14.5 | **75** | 60.6 | 52.9 | 14 | dense | Invertivore | stable |
| *Turdus pilaris* | 75 | 26.4 | 9.1 | 60.6 | **64.7** | 14 | dense | Invertivore | stable |
| *Turdus viscivorus* | 50 | 12.7 | **40.9** | 33.3 | 20.6 | 10 | semi-open | Omnivore | stable |
